# Supplementary material for: High-Level Production of Bacteriotoxic Phospholipase A1 in Bacterial Host Pseudomonas fluorescens via ABC Transporter-Mediated Secretion and Inducible Expression
Source: MDPI journal article supplement (doi:10.3390/microorganisms8020239), 2020-02-11
Supplement: s1 [file s1]

# High-Level Production of Bacteriotoxic Phospholipase A1 in Bacterial host *Pseudomonas fluorescens* Via ABC-Transporter Mediated Secretion and Inducible expression

Jiyeon Park <sup>1,2,†</sup>, Gyeong Tae Eom <sup>3,†</sup>, Joon Young Oh <sup>4</sup>, Ji Hyun Park <sup>4</sup>,  
Sun Chang Kim <sup>2,5</sup>, Jae Kwang Song <sup>4</sup>, Jung Hoon Ahn <sup>1,5,\*</sup>

<sup>1</sup>Korea Science Academy of Korea Advanced Institute of Science and Technology, Busan 47162, Korea; [jyp131@kaist.ac.kr](mailto:jyp131@kaist.ac.kr)

<sup>2</sup>Intelligent Synthetic Biology Center, 291 Daehak-ro, Yuseong-gu, Daejeon 305-701, Korea; [sunkim@kaist.ac.kr](mailto:sunkim@kaist.ac.kr)

<sup>3</sup>Research Center for Bio-based Chemistry, Korea Research Institute of Chemical Technology (KRICT) 1, Ulsan, 44429, Korea; [eomgt@kRICT.re.kr](mailto:eomgt@kRICT.re.kr)

<sup>4</sup>Research Center for Bio-based Chemistry, Korea Research Institute of Chemical Technology (KRICT), Daejeon 34114, Korea; [jyoh@kRICT.re.kr](mailto:jyoh@kRICT.re.kr) (J.Y.O.); [jhpark2@kRICT.re.kr](mailto:jhpark2@kRICT.re.kr) (J.H.P.); [ajee0414@gmail.com](mailto:ajee0414@gmail.com) (J.K.S.)

<sup>5</sup>Department of Biological Sciences, Korea Advanced Institute of Science and Technology, Daejeon 34141, Korea

\*Correspondence: [hoony@kaist.ac.kr](mailto:hoony@kaist.ac.kr) (J.H.A.); Tel.: 8251-606-2335

†These authors contributed equally to this work

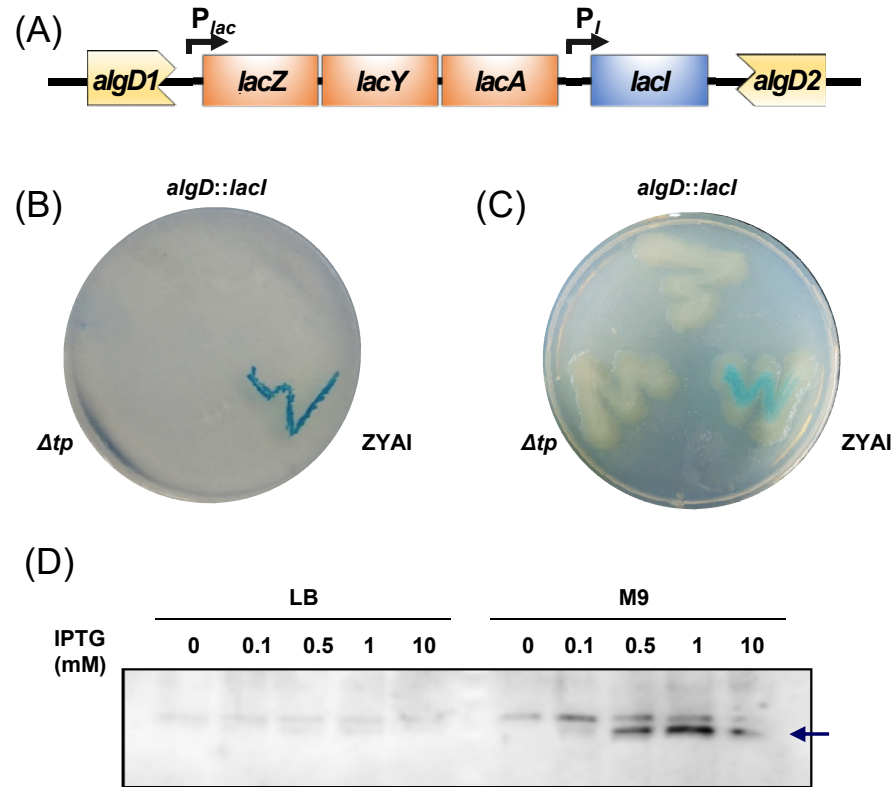

**Figure S1.** Construction of *P. fluorescens* ZYAI. (A) Genomic organization of knocked-in *P. fluorescens* ZYAI. (B) Each recombinant *P. fluorescens* was streaked on an M9 agar plate containing 40  $\mu$ g/ml X-Gal, 1 mM IPTG, and 0.6 % lactose as sole carbon source. *P. fluorescens*  $\Delta tp$  and *algD::lacI* could not grow in lactose supplemented M9 medium. (C) It was streaked similarly on an M9 agar plate containing 40  $\mu$ g/ml X-Gal, 1 mM IPTG, 0.6 % lactose, and 2 % glucose. Only *P. fluorescens* ZYAI could hydrolyze X-gal to show a blue colony. (D) Western blot for the analysis of secreted PlaA from *P. fluorescens* ZYAI in the different IPTG concentrations on LB or M9 medium. The arrow indicates PlaA (45 kDa).  $\Delta tp$ :  $\Delta tliA$   $\Delta prtA$ , *algD::lacI*: *lacI* knocked-in  $\Delta tp$ , ZYAI: *lacZYA* and *lacI* knocked in  $\Delta tp$ .

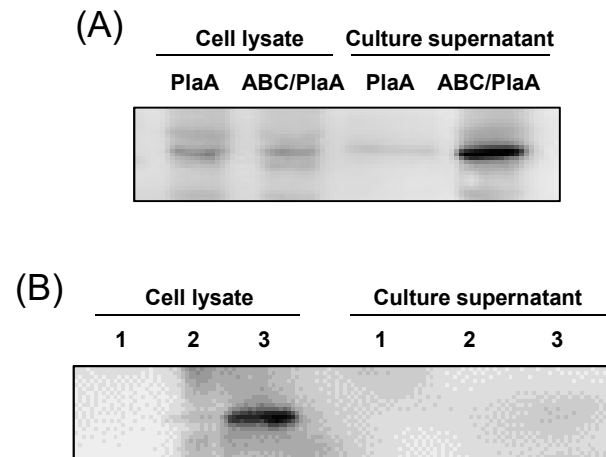

**Figure S2.** Secretion of PlaA by the ABC transporter system. **(A)** *P. fluorescens* cells harboring the PlaA-encoding gene fused with LARD3 were cultured at 25 °C for 4 days in the presence or absence of the ABC transporter. Western blot analysis was performed in the cell and in the supernatant. **(B)** PlaA expression without LARD3 was analyzed. Three plasmids were used for this purpose: pDSK (1), pDSK-PlaA (2), and pDSK-PlaA/PlaS (3), with control, PlaA, and PlaA/PlaS in pDSK519, respectively. Culture conditions and analyses used were the same as above.
